# Supplementary material for: Epigenome editing strategies for the functional annotation of CTCF insulators
Source: PubMed Central journal article supplement (PMC6751197; doi:10.1038/s41467-019-12166-w), 2019-09-18
Supplement: 41467_2019_12166_MOESM2_ESM.pdf [file 41467_2019_12166_MOESM2_ESM.pdf]

## Description of Additional Supplementary Files

File Name: Supplementary Data 1

Description: Guide RNA sequences

File Name: Supplementary Data 2

Description: CHIP-qPCR primer sequences

File Name: Supplementary Data 3

Description: BS-seq primer sequences
